## RESEARCH ARTICLE

# Hepatitis B and hepatitis C virus infections and associated factors among prisoners in Gondar City, Northwest Ethiopia

Kebebe Tadesse<sup>1,2\*</sup>, Getnet Ayalew<sup>1</sup>, Yihenew Million<sup>1</sup>, Aschalew Gelaw<sup>1</sup>

**1** Department of Medical Microbiology, School of Biomedical and Laboratory Sciences, College of Medicine and Health Science, University of Gondar, Gondar, Ethiopia, **2** Department of Medical Laboratory Sciences, Pawe Health Science College, Pawe, Ethiopia

\* [kebebe23@gmail.com](mailto:kebebe23@gmail.com)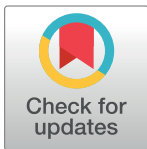

## Abstract

### Background

Globally, hepatitis B virus (HBV) and hepatitis C virus (HCV) cause considerable morbidity and mortality from their acute and chronic infections. The transmission of the viruses within the prisons is high due to overcrowding, and other risk behaviors such as drug use, and unsafe sexual practices. This study aimed at determining the prevalence and associated factors of HBV and HCV infections among prisoners in Gondar city, Northwest Ethiopia.

### Methods

A cross-sectional study was conducted in the Gondar City Prison Center from May 1, 2022, to July 30, 2022. A total of 299 prison inmates were selected by using a systematic random sampling technique. A semi-structured questionnaire was used to collect data on sociodemographic, clinical, behavioral and prison related factors. Five milliliters of blood sample were collected, and the serum was separated from the whole blood. The serum was tested for HBV surface antigen (HBsAg) and anti-HCV antibody by using an Enzyme-Linked Immunosorbent Assay (ELISA). Data was entered using EpiData version 4.6.0 and exported to SPSS version 20 for analysis. Logistic regression analysis was done to assess the association between the independent variables and HBV and HCV infections. P-values < 0.05 were considered statistically significant.

### Results

The overall seroprevalence of HBV or HCV infections was 10.4%. The seroprevalence of HBV and HCV infections was 7.0% and 4.0%, respectively. It has been demonstrated that having several heterosexual partners, sharing sharp materials in prison, having longer imprisonment, and having a body tattoo are significantly associated with HBV infection. The presence of a body tattoo, a history of surgical procedures, and previous imprisonment are associated risk factors for HCV infection.

## OPEN ACCESS

**Citation:** Tadesse K, Ayalew G, Million Y, Gelaw A (2024) Hepatitis B and hepatitis C virus infections and associated factors among prisoners in Gondar City, Northwest Ethiopia. PLoS ONE 19(4): e0301973. <https://doi.org/10.1371/journal.pone.0301973>

**Editor:** Jason T. Blackard, University of Cincinnati College of Medicine, UNITED STATES

**Received:** June 20, 2023

**Accepted:** March 26, 2024

**Published:** April 16, 2024

**Copyright:** © 2024 Tadesse et al. This is an open access article distributed under the terms of the [Creative Commons Attribution License](https://creativecommons.org/licenses/by/4.0/), which permits unrestricted use, distribution, and reproduction in any medium, provided the original author and source are credited.

**Data Availability Statement:** All the datasets are available within the manuscript.

**Funding:** The authors not received a specific fund for this research.

**Competing interests:** The authors declare that they have no competing interests.

**Abbreviations:** AOR, Adjusted Odds Ratio; COR, Crude Odds Ratio; DNA, Deoxyribonucleic Acid; ELISA, Enzyme-Linked Immune Sorbent Assay; HBV, Hepatitis B Virus; HBcAg, Hepatitis B virus

core Antigen; HBsAg, Hepatitis B virus surface Antigen; HCV, Hepatitis C Virus; HCC, Hepatocellular Carcinoma; HIV, = Human Immunodeficiency Virus; IDU, = Injecting Drug Use; RNA, Ribonucleic Acid; SOP, Standard Operational Procedure; STI, Sexually Transmitted Infection; WHO, World Health Organization.

## Conclusion

The prevalence of HBV and HCV were high-intermediate and high, respectively. Therefore, preventative and control initiatives are needed in prisons to decrease the rate of infection and transmission.

## Introduction

Hepatitis is an inflammation of the liver that most frequently occurs during viral infections [1]. Acute and chronic infection due to viral hepatitis are the leading cause of morbidity and mortality worldwide [2]. The most serious are hepatitis B virus (HBV) and hepatitis C virus (HCV) infections [3,4]. Globally, 1.4 million deaths per year are due to viral hepatitis, 96% of which are caused by HBV and HCV infections [4,5]. Both HBV and HCV cause acute and chronic infections, resulting in progressive liver damage, that potentially leads to the development of cirrhosis, hepatocellular carcinoma (HCC), or death [6,7]. Together, HBV and HCV are the most common cause of cirrhosis and HCC. Worldwide, 57% of cirrhosis are due to either HBV (30%) or HCV (27%) and 78% of HCC are due to HBV (53%) or HCV infections (25%) [8,9].

In 2010, viral hepatitis was the tenth leading cause of death, rising to seventh in 2013 [3]. It was the sixth most common cause of death in 2015, accounting for 1.34 million fatalities [2]. According to estimates from the World Health Organization (WHO), in 2019 there were 296 million and 58 million individuals living with HBV and HCV, respectively, with 1.5 million people for each newly developing chronic HBV and HCV infection. An estimated 820 000 and 290 000 people infected with HBV and HCV, respectively, died mostly from cirrhosis and HCC [10–12].

In Africa, 90% of all cases of liver cancer are due to chronic HBV and HCV infections [13]. The estimated prevalence of chronic HBV infection in Africa is 6.1%, with the highest number of infection (78 million) in sub-Saharan Africa [14]. Similarly, there are about 18 million chronic HCV patients in Africa, with sub-Saharan Africa accounting for 20% of the infections [15].

In Ethiopia, HBV and HCV account for more than 60% of chronic liver disease and up to 80% of HCC [16]. The estimated pooled prevalence of HBV and HCV were 6% and 2%, respectively [17,18]. Both HBV and HCV were significant public health problems in Ethiopia. The prevalence of HBV was 4.7% in pregnant women, 4.9% in blood donors, 5% in healthcare workers, and 5% in HIV positive patients [17,19,20]. Prevalence of HCV was estimated to be 1.83% and 0.819% among pregnant women, and blood donors, respectively [21,22]. Despite the high prevalence and availability of antiviral therapies for HBV and HCV infections, diagnosis and treatment of the infections are very low in Ethiopia [23].

The prevalence of HBV and HCV infections among prisoners were reported worldwide. The highest prevalence was reported in the West and Central Africa (23.5%) for HBV and Eastern Europe and Central Asia (20.2%) for HCV [24]. In Ethiopia, studies among prisoners are limited to a few reports [25,26]. According to the 13<sup>th</sup> version of the world prison population list, more than 10.77 million people are detained in prison around the world in 2021, with 110,000 in Ethiopia being designated as Africa's third-largest prison population [27]. Prisoners participate in a number of risky behaviors that might result in the spread of HBV and HCV infections, including injecting drug use (IDU), common use of needles for tattoos and skin piercing, sharing items like toothbrushes, and hair clippers [28,29]. Also, prisons increase

adverse health conditions through overcrowding, poor infrastructure, lack of adequate infection control practices, and limited or no access to appropriate diagnosis, care, and treatment [30].

The Ethiopian Federal Ministry of Health is currently putting preventive measures in place to stop the spread of viral hepatitis. These include screening of blood and blood products, immunizing infants, and safe injection procedures in medical facilities [31]. In 2007, the Ethiopian Federal Ministry of Health added the HBV vaccine to the standard expanded program on the immunization schedule, targeting children under one year of age [32]. Apart from this, vaccination of HBV is only given to healthcare workers in public health facilities [33]. However, for other high-risk groups such as prisoners no vaccination is given [16]. Currently, the vaccination rate among children and healthcare professionals is 90% and 20%, respectively [33,34]. Prisoners have limited access to diagnosis and preventive measures. Thus, this study was intended to determine the seroprevalence and associated factors of HBV and HCV infections among prisoners in Gondar city, Northwest Ethiopia.

## Methods and materials

### Study design, period and setting

A cross-sectional study was conducted at Gondar City Prison Center from May 1, 2022, to July 30, 2022. Gondar City Prison Center is located in Gondar city, Central Gondar Zone, Amhara National Regional State. Gondar is located in Northwest Ethiopia, 720 km from Addis Ababa and 174 km from Bahir Dar. Gondar city has an estimated population of 395,138 in 2021 [35]. According to the data obtained from the Gondar City Prison Administrative Office, the city has one prison center and more than 3500 (3100 male and 400 female) prisoners were imprisoned during the study period.

### Study population

The study population was prisoners in the Gondar City Prison Center during the study period, who were included in the study by using a systematic sampling technique. Prisoners aged 18 years and older were recruited. Prisoners who stayed in the prison for less than two weeks before data collection and those who had received HBV vaccinations were excluded.

### Sample size determination and sampling technique

The sample size was determined by using single population proportion formula considering 95% confidence level taking the proportion as 6.5% from the previous study in Dessie [25], and a margin of error of 0.03. The formula used to calculate the sample size is as follows:  $[n = (Z_{\alpha/2})^2 p(1-p) / d^2] = (1.96)^2 \times 0.065(1-0.065) / (0.03)^2 = 260$ . Accordingly, after adding a 15% non-response rate, the final sample size was 299. A systematic random sampling technique was used to recruit the 299 study participants from the sampling frame formed by the code number of prisoners obtained from the Gondar City Prison Administrative Office. More than 3500 prisoners were incarcerated during the study period. The interval (K) was obtained by dividing the total number of prisoners during the study period by sample size ( $K = 3500 / 299 = 11.7 \approx 12$ ). The first individual was selected by lottery method and the others at regular intervals of 12.

### Data collection

After obtaining signed informed consent, the data was collected by two trained data collectors, using a pre-tested semi-structured questionnaire in a private room at the prison. A face-to-

face interview technique was applied to collect data related to socio-demographic, clinical, and prison-related factors and risk behaviors of prisoners. The data about duration of incarceration was obtained from prisoners' document in the prison.

### **Specimen collection and laboratory analysis**

Trained laboratory technologists collected five milliliters of venous blood with serum separator tubes (SST) containing a clot activator. The specimen from each study participant was labeled with a unique identification number. The blood specimen was allowed to clot and retract at room temperature for 30 min and centrifuged at 5000 rpm for 5 minutes. The serum was separated from blood cells and stored at  $-20^{\circ}\text{C}$  until tested. Finally, the serum was tested for HBsAg using AiD<sup>TM</sup> HBsAg ELISA and for anti-HCV using AiD<sup>TM</sup> anti-HCV ELISA<sup>plus</sup> test kits (Beijing Wantai Biological Pharmacy Enterprise Co., Ltd) at Gondar blood bank services laboratory. A Wantai AiDTM HBsAg ELISA test kit has a sensitivity of 100% and a specificity of 99.92%, and a Wantai AiDTM anti-HCV ELISA<sup>plus</sup> test kit has a sensitivity of 100% and a specificity of 99.55% were used. All tests were carried out according to the manufacturer's instruction.

### **Data quality control**

The questionnaire was first prepared in English and then translated into the Amharic language. The second version of the questionnaire was retranslated into the original one by language experts to evaluate its consistency. Training was given to data collector about data collection procedures and interview techniques. The principal investigators supervised the data collection throughout the study period. To make sure that the questionnaire was appropriate and understandable, it was pretested on 5% of the calculated sample size at the Debarq Prison Center before the main study is conducted. Based on the findings of the pre-test, the data collector was reoriented and the questionnaire was modified as necessary.

### **Laboratory quality control**

All specimens were collected and processed according to the standard operating procedure (SOP). The quality of the specimens was checked to see if they meet the acceptable criteria like clotting and volume. The samples were tested according to the manufacturer's instruction and all quality issues were maintained by following the SOP for the detection of HBsAg and anti-HCV antibody. The quality of the test result was maintained by using internal quality control of the ELISA and by using known negative and positive samples.

### **Data processing and analysis**

The data were entered into EpiData version 4.6.0 after being confirmed as complete and were afterward exported to the Statistical Package for Social Sciences (SPSS) version 20 for analysis. The prevalence of HBV and HCV infection was analyzed using frequency analysis. Shapiro-Wilk test was done to check the normality of data. Bivariate logistic regression was done to determine predictors of HBV and HCV infections by calculating the odds ratio (OR). The Hosmer-Lemeshow goodness-of-fit test was used to assess the fitness of the model. The multi-variable logistic regression model was then applied to the variables having a p-value of less than or equals to 0.2 in the bivariate, and the adjusted odds ratio (AOR) for those variables was obtained. Variables with p-values less than 0.05 were considered statistically significant.

## Ethical consideration

The ethical approval was obtained from School of Biomedical and Laboratory Sciences, University of Gondar Ethical Review Committee (SBMLS/201). Official permission was obtained from Gondar City Prison Administrative Office. After the explanation of the purpose of the study, all the study participants provided informed written consent. Participation in the study was on a voluntary basis and personal identifiers were not used. All data and specimens collected from study participants were coded, kept private, and only used for the intended research. Prisoners whose blood samples showed positive for HBsAg and/or anti-HCV were referred to prison doctors for further examination and care.

## Results

### Socio-demographic characteristics of prisoners

A total of 299 prisoners participated in the study. The age of the prisoners ranges from 18 to 85 years with the median and interquartile age range (IQR) of 32 (25–43) years. The majority of the study subjects 265 (88.6%) were males, and half of the participants 152 (50.8%) were from rural areas. Most of the participants were married 159 (53.2%). More than one-third, 127 (42.5%) of the prisoners were illiterate. One hundred thirty-seven (45.8%) of the participants were farmers and 80 (26.8%) were self-employed (Table 1).

### Clinical, behavioral, and prison-related factors

A total of 36 (12.0%) participants had a history of previous incarceration. Most of the study participants 189 (63.2%) had been incarcerated for at least more than one year at the time of

**Table 1. Socio-demographic characteristics of prisoners at Gondar City Prison Center, Northwest Ethiopia, 2022.**

| Variable             | Category          | Frequency | Percentage |
|----------------------|-------------------|-----------|------------|
| Gender               | Male              | 265       | 88.6       |
|                      | female            | 34        | 11.4       |
| Age range (in years) | 18–24             | 72        | 24.1       |
|                      | 25–34             | 89        | 29.8       |
|                      | 35–44             | 70        | 23.4       |
|                      | ≥45               | 68        | 22.7       |
| Marital status       | Single            | 89        | 29.8       |
|                      | Married           | 159       | 53.2       |
|                      | Divorced          | 49        | 16.4       |
|                      | Widowed           | 2         | 0.7        |
| Residence            | Rural             | 152       | 50.8       |
|                      | Urban             | 147       | 49.2       |
| Educational status   | Illiterate        | 127       | 42.5       |
|                      | Primary school    | 106       | 35.5       |
|                      | Secondary school  | 50        | 16.7       |
|                      | College and above | 16        | 5.4        |
| Occupational status  | Student           | 31        | 10.4       |
|                      | Self-employed     | 80        | 26.8       |
|                      | Employed          | 24        | 8.0        |
|                      | Unemployed        | 12        | 4.0        |
|                      | Housewife         | 15        | 5.0        |
|                      | farmer            | 137       | 45.8       |

<https://doi.org/10.1371/journal.pone.0301973.t001>

**Table 2. Clinical, behavioral, and prison-related factors of prisoners at Gondar City Prison Center, Northwest Ethiopia, 2022.**

| Variables                             | Category  | Frequency | Percentage |
|---------------------------------------|-----------|-----------|------------|
| History of previous imprisonment      | Yes       | 36        | 12.0       |
|                                       | No        | 263       | 88.0       |
| Current duration of imprisonment      | <1year    | 110       | 36.8       |
|                                       | 1–3 years | 115       | 38.5       |
|                                       | >3 years  | 74        | 24.7       |
| History of dental extraction          | Yes       | 93        | 31.1       |
|                                       | No        | 206       | 68.9       |
| History of blood transfusion          | Yes       | 19        | 6.4        |
|                                       | No        | 280       | 93.6       |
| Surgical procedure                    | Yes       | 54        | 18.1       |
|                                       | No        | 245       | 81.9       |
| Sharing sharp materials in prison     | Yes       | 86        | 28.8       |
|                                       | No        | 213       | 71.2       |
| Ever use IDU                          | Yes       | 24        | 8.0        |
|                                       | No        | 275       | 92.0       |
| Having body tattoo                    | Yes       | 101       | 33.8       |
|                                       | No        | 198       | 66.2       |
| Having body piercing                  | Yes       | 66        | 22.1       |
|                                       | No        | 233       | 77.9       |
| Share personal belongings with other  | Yes       | 93        | 31.1       |
|                                       | No        | 206       | 68.9       |
| History of illicit drug use           | Yes       | 39        | 13.0       |
|                                       | No        | 260       | 87.0       |
| Multiple heterosexual partners        | Yes       | 104       | 34.8       |
|                                       | No        | 195       | 65.2       |
| Smoking practice before imprisonment  | Yes       | 46        | 15.4       |
|                                       | No        | 253       | 84.6       |
| Frequent alcohol consumption history  | Yes       | 104       | 34.8       |
|                                       | No        | 195       | 65.2       |
| Contact with the jaundiced patient    | Yes       | 144       | 48.2       |
|                                       | No        | 155       | 51.8       |
| Venous or body piercing for treatment | Yes       | 84        | 28.1       |
|                                       | No        | 215       | 71.9       |
| History of STI                        | Yes       | 52        | 17.4       |
|                                       | No        | 247       | 82.6       |

IDU: Injecting Drug Use, STI: Sexually Transmitted Infection, Venous or body piercing for treatment: Traditional scarification.

<https://doi.org/10.1371/journal.pone.0301973.t002>

the data collection. The median (IQR) year of the duration of incarceration was 2 (0.8–3) years with a range of 1 month to 14 years. Among participants, 104(34.8%) had a history of multiple heterosexual partners and 101(33.8%) had experienced body tattoos. Additionally, 86 (28.8%) had a history of sharing sharp materials in prison and 54 (18.1%) had a history of surgical procedures (Table 2).

### Prevalence of hepatitis B and hepatitis C viruses

The overall seroprevalence of HBV or HCV infections was 10.4% (31/299) (95% CI: 7.4–14.0). The seroprevalence of HBV and HCV was 7.0% (21/299) (95% CI: 4.4–10.5) and 4.0% (12/

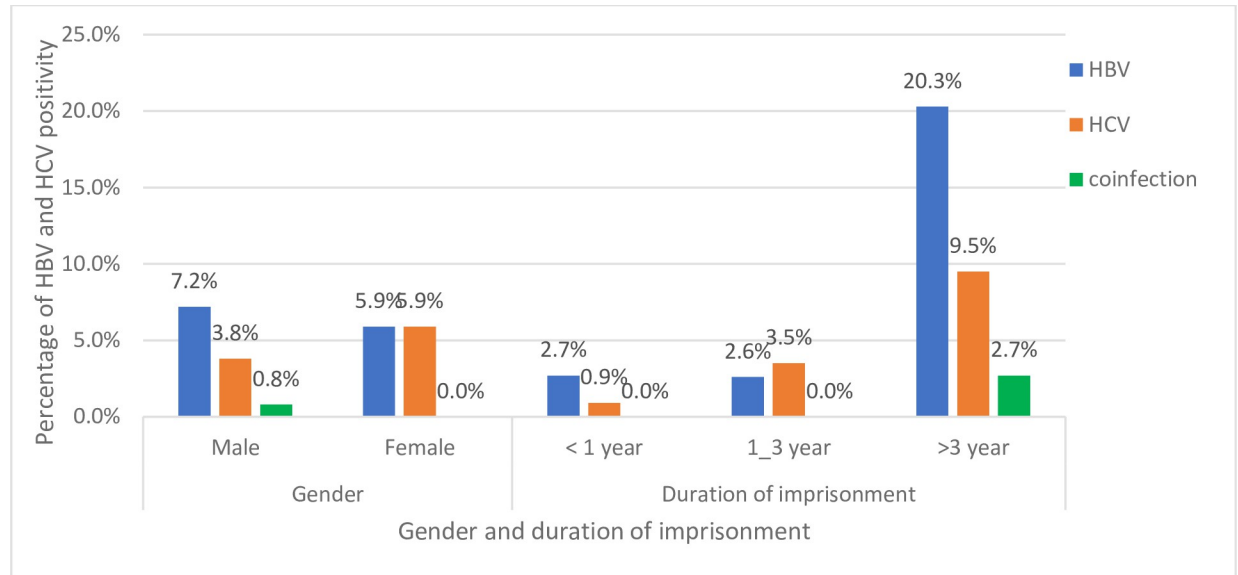

**Fig 1. Hepatitis B and hepatitis C virus distribution by gender and duration of imprisonment at Gondar City Prison Center, Northwest Ethiopia, 2022.**

<https://doi.org/10.1371/journal.pone.0301973.g001>

299) (95% CI: 2.1–6.9), respectively including 0.7% (2/299) coinfections. The prevalence of HBV was higher in males (7.2%) (19/265) than females 5.9% (2/34), while the rate of HCV infection was higher in females (5.9%) (2/34) than males (3.8%) (19/265). The prevalence of both HBV and HCV infections was higher in those prisoners incarcerated for more than three years 20.3% (15/74) and 9.5% (7/74), respectively (Fig 1).

### Factors associated with HBV infection

Determinant variables to HBV infection of prisoners were evaluated by bivariate and multivariate binary logistic regression analysis models. In the binary logistic regression analysis model, none of the sociodemographic variables show a statistically significant association with HBV infection. Besides behavioral and prison-related factors, duration of imprisonment, sharing sharp materials, having body tattoos, multiple heterosexual partners, and a history of STI show statistically significant associations with HBV infection. However, in the multivariable logistic regression analysis model, duration of imprisonment for more than three years (AOR = 6.18; 95%CI: 1.17–22.64), sharing sharp materials in prison (AOR = 4.85; 95%CI: 1.22–19.26), having body tattoo (AOR = 5.29; 95%CI: 1.58–17.71) and having multiple heterosexual partners (AOR = 4.31; 95%CI: 1.10–16.85) have remained statistically associated with HBV infection among prisoners (Table 3).

### Factors associated with HCV infection

To determine associated factors for HCV infection, both bivariate and multivariate logistic regression analyses were done. Initially, in the bivariate logistic regression analysis; history of previous imprisonment, duration of stay in prison, history of blood transfusion, history of surgical procedure, having body tattoo, and having multiple heterosexual partners showed significant association with the dependent variable. However, there is no bivariate association between any of the socio-demographic features of participants with anti-HCV positivity. The results of multivariate logistic regression showed that HCV exposure had a statistically significant relationship with prisoners with a history of previous imprisonment (AOR = 6.49; 95%

**Table 3. Bivariate and multivariate logistic regression analysis of possible risk factors for HBV infection among prisoners in Gondar City Prison Center, Northwest Ethiopia, 2022.**

| Variables                                 | Category  | HBV            |                | COR (95% CI)      | P value | AOR (95% CI)      | P value |
|-------------------------------------------|-----------|----------------|----------------|-------------------|---------|-------------------|---------|
|                                           |           | Positive N (%) | Negative N (%) |                   |         |                   |         |
| Residence                                 | Rural     | 14 (66.7)      | 138 (49.6)     | 2.03 (0.79–5.18)  | 0.139   | 3.11 (0.77–12.51) | 0.111   |
|                                           | Urban     | 7 (33.3)       | 140 (50.4)     | 1                 |         | 1                 |         |
| Age range (in years)                      | 18–24     | 4 (19.0)       | 68 (24.5)      | 1                 |         | 1                 |         |
|                                           | 25–34     | 4 (19.0)       | 85 (30.6)      | 0.8 (0.19–3.32)   | 0.758   | 0.31 (0.05–1.94)  | 0.210   |
|                                           | 35–44     | 4 (19.0)       | 66 (23.7)      | 1.0 (0.25–4.29)   | 0.967   | 0.29 (0.04–1.94)  | 0.200   |
|                                           | ≥45       | 9 (42.9)       | 59 (21.2)      | 2.6 (0.76–8.86)   | 0.128   | 0.58 (0.11–3.12)  | 0.522   |
| History of previous imprisonment          | Yes       | 5 (23.8)       | 31 (11.2)      | 2.5 (0.85–7.27)   | 0.095   | 2.54 (0.64–10.10) | 0.186   |
|                                           | No        | 16 (76.2)      | 247 (88.8)     | 1                 |         | 1                 |         |
| Duration of stay in prison                | <1year    | 3 (14.3)       | 107 (38.5)     | 1                 |         | 1                 |         |
|                                           | 1–3 years | 3 (14.3)       | 112 (40.3)     | 0.96 (0.19–4.84)  | 0.956   | 0.79 (0.12–5.29)  | 0.811   |
|                                           | >3 years  | 15 (71.4)      | 59 (21.2)      | 9.07 (2.52–25.60) | 0.001*  | 6.18 (1.17–22.64) | 0.032*  |
| Surgical procedure                        | Yes       | 7 (33.3)       | 47 (16.9)      | 2.46 (0.94–6.42)  | 0.066   | 2.04 (0.56–7.44)  | 0.279   |
|                                           | No        | 14 (66.7)      | 231 (83.1)     | 1                 |         | 1                 |         |
| Sharing sharp materials in prison         | Yes       | 15 (71.4)      | 71 (25.5)      | 7.29 (2.72–19.51) | ≤0.001* | 4.85 (1.22–19.26) | 0.025*  |
|                                           | No        | 6 (28.6)       | 207 (74.5)     | 1                 |         | 1                 |         |
| Ever use IDU                              | Yes       | 4 (19.0)       | 20 (7.2)       | 3.04 (0.93–9.89)  | 0.065   | 1.65 (0.27–10.00) | 0.588   |
|                                           | No        | 17 (81.0)      | 258 (92.8)     | 1                 |         | 1                 |         |
| Having body tattoo                        | Yes       | 16 (76.2)      | 85 (30.6)      | 7.27 (2.58–20.48) | ≤0.000* | 5.29 (1.58–17.71) | 0.007*  |
|                                           | No        | 5 (23.8)       | 193 (69.4)     | 1                 |         | 1                 |         |
| Share personal belongings with other      | Yes       | 10 (47.6)      | 83 (29.9)      | 2.14 (0.87–5.22)  | 0.096   | 0.28 (0.05–1.50)  | 0.138   |
|                                           | No        | 11 (52.4)      | 195 (70.1)     | 1                 |         | 1                 |         |
| History of STI                            | Yes       | 8 (38.1)       | 44 (15.8)      | 3.27 (1.28–8.36)  | 0.013*  | 1.22 (0.29–5.06)  | 0.780   |
|                                           | No        | 13 (61.9)      | 234 (84.2)     | 1                 |         | 1                 |         |
| Contact with jaundiced patient            | Yes       | 13 (61.9)      | 131 (47.1)     | 1.8 (0.73–4.54)   | 0.197   | 1.53 (0.35–6.68)  | 0.576   |
|                                           | No        | 8 (38.1)       | 147 (52.9)     | 1                 |         | 1                 |         |
| History of multiple heterosexual partners | Yes       | 15 (71.4)      | 89 (32.0)      | 5.3 (1.99–14.14)  | 0.001*  | 4.31 (1.10–16.85) | 0.036*  |
|                                           | No        | 6 (28.6)       | 189 (68.0)     | 1                 |         | 1                 |         |

AOR: Adjusted odds ratio; COR: Crude odds ratio; HBV: Hepatitis B virus; IDU: Injecting drug use, STI: Sexually transmitted infection

\*The observed difference is statistically significant.

<https://doi.org/10.1371/journal.pone.0301973.t003>

CI: 1.34–18.39), surgical procedure (AOR = 5.01; 95%CI: 1.12–22.42), and having body tattoo (AOR = 5.66; 95%CI: 1.18–17.05) (Table 4).

## Discussion

Prisons are known to be a high-risk environment for HBV and HCV infections [36]. Indeed, prisoners frequently have chronic HBV and HCV infections [37]. Several factors have been linked to the increased prevalence of HBV and HCV infections among prisoners, such as low socioeconomic status and high-risk behaviors including getting tattoos, using drugs, sharing needles, and engaging in unprotected sexual activity [25,38]. In addition, insufficient living conditions like overcrowding and a lack of early detection and treatment in prisons may contribute to the quicker rate of infection [36,39].

In the current study, a prevalence of 7.0% (95% CI: 4.4–10.5) HBV was found among prisoners in the Gondar City Prison Center. The World Health Organization classified the



**Table 4. Bivariate and multivariate logistic regression analysis of possible risk factors for HCV infection among prisoners at Gondar City Prison Center, Northwest Ethiopia, 2022.**

| Variable                             | Category  | HCV            |                | COR (95% CI)       | P value | AOR (95% CI)       | P value |
|--------------------------------------|-----------|----------------|----------------|--------------------|---------|--------------------|---------|
|                                      |           | Positive N (%) | Negative N (%) |                    |         |                    |         |
| History of previous imprisonment     | Yes       | 5 (41.7)       | 31 (10.8)      | 5.89 (1.77–19.72)  | 0.004*  | 6.49 (1.34–18.39)  | 0.020*  |
|                                      | No        | 7 (58.3)       | 256 (89.2)     | 1                  |         | 1                  |         |
| Current duration of stay in prison   | <1year    | 1 (8.3)        | 109 (38.0)     | 1                  |         | 1                  |         |
|                                      | 1–3 years | 4 (33.3)       | 111 (38.7)     | 3.93 (0.43–35.71)  | 0.224   | 3.18 (0.19–53.58)  | 0.423   |
|                                      | >3 years  | 7 (58.3)       | 67 (23.3)      | 11.39 (1.37–94.62) | 0.024*  | 12.62 (0.85–187.4) | 0.066   |
| History of dental extraction         | Yes       | 6 (50.0)       | 87 (30.3)      | 2.29 (0.72–7.33)   | 0.159   | 1.63 (0.40–6.65)   | 0.494   |
|                                      | No        | 6 (50.0)       | 200 (69.7)     | 1                  |         | 1                  |         |
| History of blood transfusion         | Yes       | 4 (33.3)       | 15 (5.2)       | 9.07 (2.45–33.53)  | 0.001*  | 3.35 (0.63–17.72)  | 0.154   |
|                                      | No        | 8 (66.7)       | 272 (94.8)     | 1                  |         | 1                  |         |
| Surgical procedure                   | Yes       | 8 (66.7)       | 46 (16.0)      | 10.48 (3.03–26.24) | ≤0.001* | 5.01 (1.12–22.42)  | 0.035*  |
|                                      | No        | 4 (33.3)       | 241 (84.0)     | 1                  |         | 1                  |         |
| Sharing sharp materials in prison    | Yes       | 6 (50.0)       | 80 (27.9)      | 2.59 (0.81–8.26)   | 0.108   | 1.01 (0.19–5.36)   | 0.990   |
|                                      | No        | 6 (50.0)       | 207 (72.1)     | 1                  |         | 1                  |         |
| Having body tattoo                   | Yes       | 9 (75.0)       | 92 (32.1)      | 6.35 (1.68–24.04)  | 0.006*  | 5.66 (1.18–17.05)  | 0.030*  |
|                                      | No        | 3 (25.0)       | 195 (67.9)     | 1                  |         | 1                  |         |
| share personal belongings with other | Yes       | 6 (50.0)       | 87 (30.3)      | 2.29 (0.72–7.34)   | 0.159   | 2.25 (0.43–11.87)  | 0.339   |
|                                      | No        | 6 (50.0)       | 200 (69.7)     | 1                  |         | 1                  |         |
| multiple heterosexual partners       | Yes       | 8 (66.7)       | 96 (33.4)      | 3.98 (1.17–13.55)  | 0.027*  | 2.06 (0.41–10.45)  | 0.383   |
|                                      | No        | 4 (33.3)       | 191 (66.6)     | 1                  |         | 1                  |         |
| history of STI                       | Yes       | 4 (33.3)       | 48 (16.7)      | 2.49 (0.72–8.60)   | 0.149   | 0.59 (0.10–3.53)   | 0.562   |
|                                      | No        | 8 (66.7)       | 239 (83.3)     | 1                  |         | 1                  |         |

AOR: Adjusted odds ratio, COR: Crude odds ratio, HCV: Hepatitis C virus, STI: Sexually transmitted infection

\*: The observed difference is statistically significant.

<https://doi.org/10.1371/journal.pone.0301973.t004>

prevalence of chronic HBV infection as high ( $\geq 8\%$ ), higher-intermediate (5–7.99%), lower-intermediate (2–4.99%), and low ( $< 2\%$ ) [40]. According to this classification, HBV has a higher-intermediate prevalence in the present study. Our estimate is consistent with pooled national prevalence of HBV in Ethiopia 6% and reports from systematic review of HBV among pregnant women 4.7%, blood donors 4.9%, healthcare workers 5%, and HIV positive patients 5% [17,19,20]. In comparison to similar populations, this finding was in agreement with previous literature in Dessie (6.5%), Jimma (5.8%), Woldia (10.4%), and Iran (6.5%) [25,26,41,42]. However, in other studies in Africa and Asia higher prevalence of HBV was obtained among prisoners, 12.5% in West Africa, 16.3% and 13.7% in two Nigeria studies, 12.9% in Cameroon, and 13.6% in Taiwan [37,38,43–45]. These discrepancies may be due to differences in sample size, diagnostic methodology, socioeconomic and cultural factors, the lifestyle of the community, and high-risk behavioral practices such as IDU, homosexuality, and a long stay in the prison which are the primary risk variables that have been discussed in previous studies. Also, it could be explained by differences in the prevalence of infection in communities. In sub-Saharan Africa, Central Africa has the highest prevalence of HBV and followed by West Africa [14]. Additionally, this study did not detect HBV DNA and other serologic markers like anti-HBsAg and anti-HBcAg, which might underestimate the detection rate of the viral infection in this study. On the contrary, studies in Europe had lower HBV prevalence of 0.8%, 1.9%, and 2.6% in Belgium, Sweden, and Turkey, respectively [46–48]. The possible explanation for this great difference might be due to the highest endemic rates of

HBV infection in sub-Saharan Africa when compared to European countries [4,46]. The standard of screening procedures, the availability of immunization, and the degree of stakeholder involvement in infection prevention should also be taken into consideration as potential reasons for the low level of prevalence estimates in developed countries [17].

In the present study, the result showed the prevalence of HCV among Gondar city prisoners was 4.0% (95% CI: 2.1–6.9). The World Health Organization classified HCV infection as high, moderate, or low endemic when the prevalence is > 3.5%, 1.5–3.5%, and < 1.5%, respectively [49]. Thus, the finding of the study showed that HCV infection is highly endemic in Gondar city prisoners. This finding is significantly higher than a pooled prevalence in general population (2%), among pregnant women 1.83% and blood donors 0.819% [18,21,22]. Prisoners have a high risk of contracting HCV, thus regular health checks and the detection of infected individuals and identifying associated factors are crucial to preventing the disease and lowering the risk of transmission both within and outside of prisons [50].

Although sparse data exist on HCV prevalence among prisoners in Ethiopia, the results of this study are in accordance with a previous report from Jimma where HCV prevalence among prisoners was estimated at 2.6% [26]. However, the prevalence of HCV infection in this study is higher than the study in Dessie (1.2%) [25]. It might be caused by variations in the prison population like the density of prisoners and risk behaviors among the various prison populations. Furthermore, even though HCV is very common in prisoners and threatens their health status and conditions, there is still no screening program in Ethiopia [51]. The result was comparable with reports from Brazilian and Belgium studies that found a prevalence of 2.4% and 5.0%, respectively [46,52]. However, a low prevalence of HCV infection was observed in this study, than the prevalence of the disease reported in New York (10.1%) [53], California (34.3%) [54], Iran (28%) [55], Taiwan (33.5%) [45], Turkey (17.7%) [48], Sweden (17.0%) [47], and Ireland (22.2%) [56]. The type of prison population examined, based on important risk factors such as IDU, history of imprisonment, and engagement in high-risk sexual behaviors like homosexual activity, may contribute to the disparity in prevalence among studies conducted in various countries [55]. Additionally, the observed variation could be attributed to differences in geographic location, testing methodologies, and sample sizes.

In this study, the socio-demographic characteristics of the participants were not found to be significantly associated with the presence of HBV and HCV infections. However, a study by Kassa et al. suggests that old age is a risk factor for HBV infection [25]. Similarly, studies by Moradi et al. and Puga et al. show that old age was associated with higher HCV infection [52,57]. More than half of our study population was under 35 years might partly explain absence of significant association in this study.

This study demonstrated that the duration of imprisonment was found to be significantly associated with HBV infection. The highest prevalence was observed in those incarcerated for more than three years. This association has also been reported in other previous studies [44,58]. The association between HBV prevalence and prolonged incarceration may be explained by the fact that individuals serving longer sentences are more likely to have prolonged interactions with high-risk populations, thereby increasing their likelihood of encountering risk factors [59].

This study indicates that having a body tattoo is an important risk factor for both HBV and HCV infections. Similar findings of a significant association between having a body tattoo and HBV or HCV infections have been documented by other investigators as well [25,43,56,60]. Tattooing in prisons often involves the use of unsterile equipment, which poses a potential risk for the transmission of blood-borne infections [61]. To minimize the potential harm from these activities, prison officials should provide prisoners with access to harm reduction programs.

This study also found that sharing of sharp materials was significantly associated with HBV infection. Poor living conditions prevailing in prisons include overcrowding often lead to inadequate hygiene practices such as sharing of unsterile razors, needles, and cooking equipment like knives [62]. This practice may be attributed to the various activities carried out in prison which require the use of different sharp materials such as sewing traditional clothes [41]. Hepatitis B virus is highly infectious and can remain stable on environmental surfaces for more than 7 days. Therefore, practices like sharing needles and razors may have contributed to the spread of the virus within this population [43].

Prisoners who engaged in sex with multiple partners had higher odds of HBV infection compared to their counterparts. Similar findings were documented in Dessie and Jimma [25,26]. Increased data suggests that prisoners engage in more sexual activity than the general public, with a greater number of sexual partners and lower condom usage [38].

The present study demonstrated a significantly association between HCV infection and a history of previous imprisonment. Consistently, studies by Khajedaluae et al. and Moradi et al. have reported similar results [39,63]. Multiple incarcerations increase the likelihood of engaging in high-risk behaviors and may lead to drug-related offenses or other confounding factors within the prison, such as violence [64]. Furthermore, the combination of several risk factors and the crowded prison environment may facilitate the transmission of this virus [25].

In this study, prisoners with a history of surgical procedures had five times higher odds of HCV infection compared to those without such history. Similar results were reported by Kazi et al. and Zenebe et al. [65,66]. Failure to adhere to infection control procedures during surgical operations, as well as a gap in the cleaning and sterilizing of materials used in procedures, contribute to increase the transmission of HCV infection [67].

In the present study, IDU was not associated with either HBV or HCV infections. This finding is, however, paradoxical, as several authors have reported an association between IDU and HBV infection [43,68,69]. Similarly, in most studies conducted in the USA [53,54], Europe [56,60], Iran [39,63], and Egypt [70] IDU is identified as the leading risk factor for HCV transmission due to the sharing of needles and drug use equipment. This disparity might be due to low population of IDUs observed in this study sample.

Blood-borne infections such as HCV can spread through blood transfusions. Studies in Jimma and Dessie show that blood transfusion was significantly associated with the transmission of HCV. Contrary, it was not significantly associated with anti-HCV antibody seropositivity in the present study [25,26]. The possible reason for the lack of significant association of HCV infection with blood transfusion might be improved screening of blood before transfusion in this study area.

## Limitations of the study

Limitations of this study include the inability to determine whether the prisoners contracted the virus within or outside of the prison. Reporting bias and social desirability bias may have influenced the vaccination history, as well as clinical and prison-related variables, which were based on self-reporting by the participants. Additionally, due to resource limitations, other HBV markers (anti-HBsAg, anti-HBcAg, and HBV DNA) were not included, thus possibly leading to an underestimation of the actual prevalence of HBV infection. Furthermore, the study may lack representativeness for a wider population due to the inadequate sample size.

## Conclusion

The seroprevalence of HBV and HCV infections among prisoners at the Gondar City Prison Center is relatively high. This high infection rate is associated with a duration of

imprisonment, sharing sharp materials in prison, having body tattoos, and having multiple heterosexual partners for HBV infection, whereas, a history of previous imprisonment, history of operation, and having body tattoos are associated with HCV infection. Prison health systems should provide screening, diagnosis, and treatment services for HBV and HCV infections. Also, it is important to set regular primary prevention programs in prisons such as vaccination, and health education to decrease the risk of being infected and prevent the transmission of the disease.

## Supporting information

### S1 File.

(DOCX)

### S2 File.

(DOCX)

## Acknowledgments

Our special thanks and appreciation go to all the study participants who consented to take part in the current study, as well as to the Gondar City Prison Center clinic staff and authorities for their active support during data collection. We also acknowledge Gondar Blood Bank laboratory staff for allowing the use of laboratory equipment.

## Author Contributions

**Conceptualization:** Kebebe Tadesse, Getnet Ayalew, Yihenew Million, Aschalew Gelaw.

**Data curation:** Kebebe Tadesse, Getnet Ayalew, Yihenew Million, Aschalew Gelaw.

**Formal analysis:** Kebebe Tadesse, Getnet Ayalew, Yihenew Million, Aschalew Gelaw.

**Investigation:** Kebebe Tadesse.

**Methodology:** Kebebe Tadesse, Getnet Ayalew, Yihenew Million, Aschalew Gelaw.

**Software:** Kebebe Tadesse, Getnet Ayalew, Yihenew Million, Aschalew Gelaw.

**Supervision:** Getnet Ayalew, Yihenew Million, Aschalew Gelaw.

**Validation:** Getnet Ayalew, Yihenew Million, Aschalew Gelaw.

**Visualization:** Getnet Ayalew, Yihenew Million, Aschalew Gelaw.

**Writing – original draft:** Kebebe Tadesse, Getnet Ayalew, Yihenew Million, Aschalew Gelaw.

**Writing – review & editing:** Kebebe Tadesse, Getnet Ayalew, Yihenew Million, Aschalew Gelaw.

## References

1. Jefferies M, Rauff B, Rashid H, Lam T, Rafiq S. Update on global epidemiology of viral hepatitis and preventive strategies. *World journal of clinical cases*. 2018; 6(13):589–99. Epub 2018/11/16. <https://doi.org/10.12998/wjcc.v6.i13.589> PMID: 30430114; PubMed Central PMCID: PMC6232563.
2. Wang H, Naghavi M, Allen C, Barber RM, Bhutta ZA, Carter A, et al. Global, regional, and national life expectancy, all-cause mortality, and cause-specific mortality for 249 causes of death, 1980–2015: a systematic analysis for the Global Burden of Disease Study 2015. *The Lancet*. 2016; 388(10053):1459–544. [https://doi.org/10.1016/S0140-6736\(16\)31012-1](https://doi.org/10.1016/S0140-6736(16)31012-1) PMID: 27733281

3. Stanaway JD, Flaxman AD, Naghavi M, Fitzmaurice C, Vos T, Abubakar I, et al. The global burden of viral hepatitis from 1990 to 2013: findings from the Global Burden of Disease Study 2013. *The Lancet*. 2016; 388(10049):1081–8. [https://doi.org/10.1016/S0140-6736\(16\)30579-7](https://doi.org/10.1016/S0140-6736(16)30579-7) PMID: 27394647
4. World Health Organization. Global hepatitis report 2017. Geneva: World Health Organization; 2017.
5. Torre P, Aglitti A, Masarone M, Persico M. Viral hepatitis: Milestones, unresolved issues, and future goals. *World J Gastroenterol*. 2021; 27(28):4603–38. <https://doi.org/10.3748/wjg.v27.i28.4603> PMID: 34366625.
6. Berumen J, Baglieri J, Kisseleva T, Mekeel K. Liver fibrosis: pathophysiology and clinical implications. *WIREs Mechanisms of Disease*. 2021; 13(1):1499. <https://doi.org/10.1002/wsbm.1499> PMID: 32713091
7. Bashir T, Asim M, Ahsan M, Zafar M, Hussain K. A case report: Patient with the history of Hepatitis C virus. *J Antivir Antiretrovir*. 2017; 9(2):055–7.
8. Perz JF, Armstrong GL, Farrington LA, Hutin YJ, Bell BP. The contributions of hepatitis B virus and hepatitis C virus infections to cirrhosis and primary liver cancer worldwide. *Journal of hepatology*. 2006; 45(4):529–38. <https://doi.org/10.1016/j.jhep.2006.05.013> PMID: 16879891
9. Fitzmaurice C, Allen C, Barber RM, Barregard L, Bhutta ZA, Brenner H, et al. Global, Regional, and National Cancer Incidence, Mortality, Years of Life Lost, Years Lived With Disability, and Disability-Adjusted Life-years for 32 Cancer Groups, 1990 to 2015: A Systematic Analysis for the Global Burden of Disease Study. *JAMA oncology*. 2017; 3(4):524–48. <https://doi.org/10.1001/jamaoncol.2016.5688> PMID: 27918777
10. World Health Organization. Fact sheets-Hepatitis C 2021 [cited 2021 November 19]. Available from: <https://www.who.int/en/news-room/fact-sheets/detail/hepatitis-c>.
11. World Health Organization. Fact sheets-Hepatitis B, 2021 [November 19, 2021]. Available from: <https://www.who.int/news-room/fact-sheets/detail/hepatitis-b#>.
12. World Health Organization. Global progress report on HIV, viral hepatitis and sexually transmitted infections, 2021: accountability for the global health sector strategies 2016–2021: actions for impact: web annex 2: data methods. 2021.
13. Jemal A, Bray F, Forman D, O'Brien M, Ferlay J, Center M, et al. Cancer burden in Africa and opportunities for prevention. *Cancer*. 2012; 118(18):4372–84. <https://doi.org/10.1002/cncr.27410> PMID: 22252462
14. Dakurah OB, Tamandjou CRT, Zunza M, Preiser W, Maponga TG. Viral hepatitis associated hepatocellular carcinoma on the African continent, the past, present, and future: a systematic review. *BMC cancer*. 2021; 21(1):1–13.
15. Layden JE, Phillips R, Opare-Sem O, Akere A, Salako BL, Nelson K, et al., editors. *Hepatitis C in sub-Saharan Africa: urgent need for attention*. Open forum infectious diseases; 2014: Oxford University Press.
16. Bane A, Patil A, Khatib M. Healthcare cost and access to care for viral hepatitis in Ethiopia. *International Journal of Innovation and Applied Studies*. 2014; 9(4):1718.
17. Yazie TD, Tebeje MG. An updated systematic review and meta-analysis of the prevalence of hepatitis B virus in Ethiopia. *BMC infectious diseases*. 2019; 19(1):1–13.
18. Deress T, Million Y, Belachew T, Jemal M, Girma M. Seroprevalence of Hepatitis C Viral Infection in Ethiopia: A Systematic Review and Meta-Analysis. *TheScientificWorldJournal*. 2021; 2021:8873389. Epub 2021/04/27. <https://doi.org/10.1155/2021/8873389> PMID: 33897305; PubMed Central PMCID: PMC8052182.
19. Kebede KM, Abateneh DD, Belay AS. Hepatitis B virus infection among pregnant women in Ethiopia: a systematic review and Meta-analysis of prevalence studies. *BMC Infectious Diseases*. 2018; 18(1):322. <https://doi.org/10.1186/s12879-018-3234-2> PMID: 29996785
20. Fite RO, Kooti W, Azeze GA, Tesfaye B, Haggisso SN. Seroprevalence and factors associated with hepatitis B virus infection in blood donors in Ethiopia: a systematic review and meta-analysis. *Archives of Virology*. 2020; 165(5):1039–48. <https://doi.org/10.1007/s00705-020-04591-w> PMID: 32219546
21. Lake EA, Fite RO, Gebrekirstos LG, Gebremedhin MH, Obsa MS, Gelaw KA. Seroprevalence of hepatitis c virus infection among blood donors in Ethiopia: a systematic review and meta-analysis. *BMC Infect Dis*. 2021; 21(1):131. Epub 2021/02/01. <https://doi.org/10.1186/s12879-021-05827-z> PMID: 33516181; PubMed Central PMCID: PMC7847585.
22. Dessalegn Mekonnen B. Prevalence of Hepatitis C Virus Infection among Pregnant Women in Ethiopia: A Systematic Review and Meta-Analysis. *Advances in Preventive Medicine*. 2021; 2021:6615008. <https://doi.org/10.1155/2021/6615008> PMID: 34136287

23. Ishizaki A, Bouscaillou J, Luhmann N, Liu S, Chua R, Walsh N, et al. Survey of programmatic experiences and challenges in delivery of hepatitis B and C testing in low-and middle-income countries. *BMC infectious diseases*. 2017; 17(1):129–40.
24. Dolan K, Wirtz AL, Moazen B, Ndeffo-mbah M, Galvani A, Kinner SA, et al. Global burden of HIV, viral hepatitis, and tuberculosis in prisoners and detainees. *The Lancet*. 2016; 388(10049):1089–102. [https://doi.org/10.1016/S0140-6736\(16\)30466-4](https://doi.org/10.1016/S0140-6736(16)30466-4) PMID: 27427453
25. Kassa Y, Million Y, Biset S, Moges F. Hepatitis B and Hepatitis C Viral Infections and Associated Factors Among Prisoners in Northeast Ethiopia. *Journal of Blood Medicine*. 2021; 12:561. <https://doi.org/10.2147/JBM.S314556> PMID: 34267568
26. Kebede W, Abdissa A, Seid Y, Mekonnen Z. Seroprevalence and risk factors of hepatitis B, hepatitis C and HIV infections among prisoners in Jimma Town, Southwest Ethiopia. *Asian Pac J Trop Dis*. 2017; 7(5):270–5.
27. Fair H, Walmsley R. World prison population list; thirteenth edition. London: Institute for Crime & Justice Policy Research 2021 [January 17, 2022]. Available from: [https://www.prisonstudies.org/sites/default/files/resources/downloads/world\\_prison\\_population\\_list\\_13th\\_edition.pdf](https://www.prisonstudies.org/sites/default/files/resources/downloads/world_prison_population_list_13th_edition.pdf).
28. O'Sullivan BG, Levy MH, Barton SG, Dolan KA, Kaldor JM, Grulich AE, et al. Hepatitis C transmission and HIV post-exposure prophylaxis after needle-and syringe-sharing in Australian prisons. *Medical Journal of Australia*. 2003; 178(11):546–9. <https://doi.org/10.5694/j.1326-5377.2003.tb05356.x> PMID: 12765501
29. Moazen B, Saeedi Moghaddam S, Silbernagl MA, Lotfizadeh M, Bosworth RJ, Alammehjerdi Z, et al. Prevalence of drug injection, sexual activity, tattooing, and piercing among prison inmates. *Epidemiologic reviews*. 2018; 40(1):58–69. <https://doi.org/10.1093/epirev/mxy002> PMID: 29860343
30. Stöver H, Tarján A, Horváth G, Montanari L. The state of harm reduction in prisons in 30 European countries with a focus on people who inject drugs and infectious diseases. *Harm Reduction Journal*. 2021; 18(1):1–7.
31. Minister of Health-Ethiopia. NATIONAL STRATEGIC PLAN FOR PREVENTION AND CONTROL OF VIRAL HEPATITIS IN ETHIOPIA, 2021–2025. 2021. Available from: <https://www.globalhep.org/sites/default/files/content/resource/files/2022-05/Final%20Hep%20NSP%202021-2025%20Aug%2027.pdf>.
32. Belete H, Kidane T, Bisrat F, Molla M, Mounier-Jack S, Kitaw Y. Routine immunization in Ethiopia. *The Ethiopian Journal of Health Development*. 2015;29.
33. Awoke N, Mulgeta H, Lolaso T, Tekalign T, Samuel S, Suleiman M, et al. Full-dose hepatitis B virus vaccination coverage and associated factors among health care workers in Ethiopia: A systematic review and meta-analysis. *PLOS ONE*. 2020;15. <https://doi.org/10.1371/journal.pone.0241226> PMID: 33108365
34. World Health Organization. Hepatitis B vaccination coverage 2022 [cited 2023 August 21]. Available from: <https://immunizationdata.who.int/pages/coverage/HEPB.html?Code=Eth&antigen=hepb3&year>.
35. world population review. Gondar Population 2022 2022 [Accessed february 15, 2022]. Available from: <https://worldpopulationreview.com/world-cities/gondar-population>.
36. Ghafari S, Sharifzadeh G, Jamali S, Tajji B, Javadmoosavi SY, Ziaee M. Prevalence of hepatitis B and C among drug-abusing male prisoners in Birjand, South Khorasan, Iran. *Archives of Iranian medicine*. 2019; 22(9):501–4. PMID: 31679371
37. Jaquet A, Wandeler G, Tine J, Dagnra CA, Attia A, Patassi A, et al. HIV infection, viral hepatitis and liver fibrosis among prison inmates in West Africa. *BMC infectious diseases*. 2016; 16(1):1–10. <https://doi.org/10.1186/s12879-016-1601-4> PMID: 27267370
38. Dan-Nwafor CC, Adeoye I, Aderemi K, Onuoha M, Adedire E, Bashorun A, et al. Serological markers and risk factors associated with Hepatitis B virus infection among Federal Capital Territory prison inmates, Nigeria: Should we be concerned? *PloS one*. 2021; 16(3):e0248045. <https://doi.org/10.1371/journal.pone.0248045> PMID: 33705419
39. Khajedaluae M, Babaei A, Vakili R, Valizade N, Homaei Shandiz F, Alavian SM, et al. Sero-Prevalence of Bloodborne Tumor Viruses (HCV, HBV, HTLV-I and KSHV Infections) and Related Risk Factors among Prisoners in Razavi Khorasan Province, Iran, in 2008. *Hepatitis monthly*. 2016; 16(12):e31541. Epub 2017/01/27. <https://doi.org/10.5812/hepatmon.31541> PMID: 28123439; PubMed Central PMCID: PMC5237471.
40. Schweitzer A, Horn J, Mikolajczyk RT, Krause G, Ott JJ. Estimations of worldwide prevalence of chronic hepatitis B virus infection: a systematic review of data published between 1965 and 2013. *The Lancet*. 2015; 386(10003):1546–55. [https://doi.org/10.1016/S0140-6736\(15\)61412-X](https://doi.org/10.1016/S0140-6736(15)61412-X) PMID: 26231459
41. Berhe H, Yismaw G, Mekonnen Z, slassie H, Anagaw B, Unakal C. Seroprevalence and Associated Risk Factors of Human Immunodeficiency Virus and Hepatitis B Virus Infections among Prison Inmates. *J Pharm Biomed Sci*. 2013; 30(30):1035–45.

42. Ziaee M, Sharifzadeh G, Namaee MH, Fereidouni M. Prevalence of HIV and hepatitis B, C, D infections and their associated risk factors among prisoners in Southern Khorasan Province, Iran. *Iranian journal of public health*. 2014; 43(2):229. PMID: [26060747](https://pubmed.ncbi.nlm.nih.gov/26060747/)
43. Kowo MP, Andoulo FA, Sizimboue DT, Ndam AWN, Ngek LT, Kouanfack C, et al. Seroprevalence of hepatitis B and associated factors among inmates: a cross sectional study in the Douala New Bell Prison, Cameroon. *The Pan African Medical Journal*. 2021; 38(355):20386. <https://doi.org/10.11604/pamj.2021.38.355.20386> PMID: [34367434](https://pubmed.ncbi.nlm.nih.gov/34367434/)
44. Lawan S, Gimba S, Elyuguda A, Sabo H, Dadile H. Hepatitis B Virus Infection among Prison Inmates in Borno State: Determination of Prevalence of Surface Antigen (HBsAg) and Possible Risk Factors of Disease. *J Hepat Res*. 2021; 6(1):1041.
45. Lu M-Y, Chen C-T, Shih Y-L, Tsai P-C, Hsieh M-H, Huang C-F, et al. Changing epidemiology and viral interplay of hepatitis B, C and D among injecting drug user-dominant prisoners in Taiwan. *Scientific reports*. 2021; 11(1):1–12.
46. Busschots D, Kremer C, Bielen R, Koc ÖM, Heyens L, Brixko C, et al. A multicentre interventional study to assess blood-borne viral infections in Belgian prisons. *BMC infectious diseases*. 2021; 21(1):1–9.
47. Gahrton C, Westman G, Lindahl K, Öhrn F, Dalgard O, Lidman C, et al. Prevalence of Viremic hepatitis C, hepatitis B, and HIV infection, and vaccination status among prisoners in Stockholm County. *BMC infectious diseases*. 2019; 19(1):1–9.
48. Keten D, Ova ME, Keten HS, Keten A, Gulderen E, Tumer S, et al. The prevalence of hepatitis B and C among prisoners in Kahramanmaras, Turkey. *Jundishapur journal of microbiology*. 2016; 9(2):e31598.
49. Mohd Hanafiah K, Groeger J, Flaxman AD, Wiersma ST. Global epidemiology of hepatitis C virus infection: new estimates of age-specific antibody to HCV seroprevalence. *Hepatology*. 2013; 57(4):1333–42. <https://doi.org/10.1002/hep.26141> PMID: [23172780](https://pubmed.ncbi.nlm.nih.gov/23172780/)
50. Crowley D, Van Hout MC, Murphy C, Kelly E, Lambert JS, Cullen W. Hepatitis C virus screening and treatment in Irish prisons from a governor and prison officer perspective—a qualitative exploration. *Health & Justice*. 2018; 6(1):23. <https://doi.org/10.1186/s40352-018-0081-6> PMID: [30569249](https://pubmed.ncbi.nlm.nih.gov/30569249/)
51. Taye BW. A path to ending hepatitis C in Ethiopia: a phased public health approach to achieve micro-elimination. *The American Journal of Tropical Medicine and Hygiene*. 2019; 101(5):963. <https://doi.org/10.4269/ajtmh.19-0295> PMID: [31516107](https://pubmed.ncbi.nlm.nih.gov/31516107/)
52. Puga MAM, Bandeira LM, Pompilio MA, Croda J, Rezende GRd, Dorisbor LFP, et al. Prevalence and incidence of HCV infection among prisoners in Central Brazil. *PloS one*. 2017; 12(1):e0169195. <https://doi.org/10.1371/journal.pone.0169195> PMID: [28060860](https://pubmed.ncbi.nlm.nih.gov/28060860/)
53. Alvarez KJ, Befus M, Herzig CT, Larson E. Prevalence and correlates of hepatitis C virus infection among inmates at two New York State correctional facilities. *Journal of infection and public health*. 2014; 7(6):517–21. <https://doi.org/10.1016/j.jiph.2014.07.018> PMID: [25182508](https://pubmed.ncbi.nlm.nih.gov/25182508/)
54. Fox RK, Currie SL, Evans J, Wright TL, Tobler L, Phelps B, et al. Hepatitis C virus infection among prisoners in the California state correctional system. *Clinical Infectious Diseases*. 2005; 41(2):177–86. <https://doi.org/10.1086/430913> PMID: [15983913](https://pubmed.ncbi.nlm.nih.gov/15983913/)
55. Behzadifar M, Gorji HA, Rezapour A, Bragazzi NL. Prevalence of hepatitis C virus infection among prisoners in Iran: a systematic review and meta-analysis. *Harm reduction journal*. 2018; 15(1):1–9.
56. Crowley D, Avramovic G, Cullen W, Farrell C, Halpin A, Keevans M, et al. New hepatitis C virus infection, re-infection and associated risk behaviour in male Irish prisoners: a cohort study, 2019. *Archives of Public Health*. 2021; 79(1):1–9.
57. Moradi G, Mohamadi P, Zareie B, Rasouli MA, Gouya MM, Jafari S. Prevalence of and risk factors for HBV and HCV among incarcerated people who inject drugs in Iran: A cross sectional study. *BMC infectious diseases*. 2020; 20(1):1–9. <https://doi.org/10.1186/s12879-020-05541-2> PMID: [33129259](https://pubmed.ncbi.nlm.nih.gov/33129259/)
58. Dana D, Zary N, Peyman A, Behrooz A. Risk Prison and Hepatitis B Virus Infection among Inmates with History of Drug Injection in Isfahan, Iran. *The Scientific World Journal*. 2013; 2013(4):735761. <https://doi.org/10.1155/2013/735761> PMID: [23737725](https://pubmed.ncbi.nlm.nih.gov/23737725/)
59. Arain A, Robaeys G, Stöver H. Hepatitis C in European prisons: a call for an evidence-informed response. *BMC Infectious Diseases*. 2014; 14(6):S17. <https://doi.org/10.1186/1471-2334-14-S6-S17> PMID: [25252822](https://pubmed.ncbi.nlm.nih.gov/25252822/)
60. Crowley D, Lambert JS, Betts-Symonds G, Cullen W, Keevans M, Kelly E, et al. The seroprevalence of untreated chronic hepatitis C virus (HCV) infection and associated risk factors in male Irish prisoners: a cross-sectional study, 2017. *Eurosurveillance*. 2019; 24(14):1800369. <https://doi.org/10.2807/1560-7917.ES.2019.24.14.1800369> PMID: [30968825](https://pubmed.ncbi.nlm.nih.gov/30968825/)
61. Belaunzaran-Zamudio PF, Mosqueda-Gomez JL, Macias-Hernandez A, Rodríguez-Ramírez S, Sierra-Madero J, Beyrer C. Burden of HIV, Syphilis, and Hepatitis B and C Among Inmates in a Prison State

- System in Mexico. *AIDS Research and Human Retroviruses*. 2017; 33(6):524–33. <https://doi.org/10.1089/AID.2016.0271> PMID: 28094553
62. Ziyad M, Kassem K, Khalil K, Sarah S, Sami R. Prevalence of antibodies to human immunodeficiency virus (HIV), hepatitis B and hepatitis C and risk factors in prisoners in Lebanon. *The Journal of Infection in Developing Countries*. 2010; 4(03):144–9. <https://doi.org/10.3855/jidc.517> PMID: 20351454
  63. Moradi G, Gouya MM, Azimizan Zavareh F, Mohamadi Bolbanabad A, Darvishi S, Aghasadeghi MR, et al. Prevalence and risk factors for HBV and HCV in prisoners in Iran: a national bio-behavioural surveillance survey in 2015. *Tropical Medicine International Health*. 2018; 23(6):641–9. <https://doi.org/10.1111/tmi.13065> PMID: 29698576
  64. Kassaian N, Adibi P, Kafashaian A, Yaran M, Nokhodian Z, Shoaee P, et al. Hepatitis C virus and associated risk factors among prison inmates with history of drug injection in Isfahan, Iran. *International Journal of Preventive Medicine*. 2012; 3(3):s146–s61. PMID: 22826759
  65. Kazi AM, Shah SA, Jenkins CA, Shepherd BE, Vermund SH. Risk factors and prevalence of tuberculosis, human immunodeficiency virus, syphilis, hepatitis B virus, and hepatitis C virus among prisoners in Pakistan. *International Journal of Infectious Diseases*. 2010; 14(3):60–6. <https://doi.org/10.1016/j.ijid.2009.11.012> PMID: 20189863
  66. Zenebe Y, Mulu W, Yimer M, Abera B. Sero-prevalence and risk factors of hepatitis B virus and human immunodeficiency virus infection among pregnant women in Bahir Dar city, Northwest Ethiopia: a cross sectional study. *BMC Infectious Diseases*. 2014; 14(1):1–7. <https://doi.org/10.1186/1471-2334-14-118> PMID: 24580859
  67. Henriot P, Castry M, Luong Nguyen LB, Shimakawa Y, Jean K, Temime L. Meta-analysis: Risk of hepatitis C virus infection associated with hospital-based invasive procedures. *Alimentary Pharmacology Therapeutics*. 2022; 56(4):558–69. <https://doi.org/10.1111/apt.17106> PMID: 35758763
  68. Khan AJ, Simard EP, Bower WA, Wurtzel HL, Khristova M, Wagner KD, et al. Ongoing transmission of hepatitis B virus infection among inmates at a state correctional facility. *American journal of public health*. 2005; 95(10):1793–9. <https://doi.org/10.2105/AJPH.2004.047753> PMID: 16186457
  69. Macalino GE, Vlahov D, Sanford-Colby S, Patel S, Sabin K, Salas C, et al. Prevalence and incidence of HIV, hepatitis B virus, and hepatitis C virus infections among males in Rhode Island prisons. *American Journal of Public Health*. 2004; 94(7):1218–23. <https://doi.org/10.2105/ajph.94.7.1218> PMID: 15226146
  70. Mohamed HI, Saad ZM, Abd-Elreheem EM, Abd-ElGhany WM, Mohamed MS, Abd Elnaeem EA, et al. Hepatitis C, hepatitis B and HIV infection among Egyptian prisoners: seroprevalence, risk factors and related chronic liver diseases. *Journal of infection and public health*. 2013; 6(3):186–95. <https://doi.org/10.1016/j.jiph.2012.12.003> PMID: 23668463
